# Supplementary material for: A local proton-transport promoter for industrial CO2 electroreduction to multicarbon products
Source: Royal Society of Chemistry journal article supplement (doi:10.1039/d4ta04672b), 2024-11-16
Supplement: d4ta04672b1.pdf [file d4ta04672b1.pdf]

## Supporting Information

### A local Proton–Transport Promoter for Industrial and Selective CO<sub>2</sub> Electroreduction to Multicarbon Products

Haiyi Guo<sup>a</sup>, Huang Qi<sup>a</sup>, Di Li<sup>a</sup>, Shiyu Dai<sup>b</sup>, Kang Yang<sup>a</sup>, Sheng Chen<sup>a</sup>, Wei Ma<sup>b\*</sup> Qiang Li<sup>a\*</sup> and  
Jingjing Duan<sup>a\*</sup>

<sup>a</sup>MIIT Key Lab Thermal Control Electronic Equipment, School of Energy and Power Engineering,  
School of Chemistry and Chemical Engineering, Nanjing University of Science and Technology,  
Nanjing, 210094, China

<sup>b</sup>Key Laboratory for Advanced Materials and Joint International Research Laboratory of Precision  
Chemistry and Molecular Engineering, Frontiers Science Center for Materiobiology and Dynamic  
Chemistry, School of Chemistry and Molecular Engineering, East China University of Science and  
Technology, Shanghai 200237, P. R. China

# 1 Experimental Section

## 2 Materials and Chemicals

3 Pyrrole ( $C_4H_5N$ ) was purchased from Maclean (China). Thiophene ( $C_4H_4S$ ), ammonium  
4 persulfate ( $(NH_4)_2S_2O_8$ ), absolute ethanol ( $C_2H_5OH$ ) and dimethylsulfoxide (DMSO,  $\geq 99.8\%$ ) were  
5 purchased from Aladdin (China). Hydrazine hydrate ( $N_2H_4 \cdot H_2O$ ), copper chloride dihydrate  
6 ( $CuCl_2 \cdot 2H_2O$ ), trisodium citrate dihydrate ( $C_6H_5Na_3O_7 \cdot 2H_2O$ ), potassium hydroxide (KOH) and  
7 isopropyl alcohol (IPA) were purchased from Sinopharm Chemical Reagent Co. Ltd (China).  $D_2O$   
8 (99.9 atom %D) was purchased from Acros Organics.

## 9 Synthesis of Polypyrrole (PPy)

10 0.1 ml pyrrole and 1.444 mmol ammonium persulfate were dissolved separately in 10 ml and  
11 20 ml deionized water (DI) with ice bath stirring for 20 min. Then, the pre-prepared ammonium  
12 persulfate solution was added slowly as an oxidant to the pyrrole solution and stirred in ice-bath for  
13 6 h. After the reaction, the dark precipitate was washed with deionized water and ethanol repeatedly  
14 by centrifugation, and then freeze-dried for 24 h.

## 15 Synthesis of Polythiophene (PTh)

16 0.2 ml thiophene and 2.534 mmol ammonium persulfate were dissolved in 30 ml deionized  
17 water with magnetic stirring for 30 min to form uniform dispersion. Then, dispersion was transferred  
18 to a Teflon-lined stainless-steel autoclave and kept at  $90^\circ C$  for 24 h. After cooling down, the  
19 brownish black precipitate was washed with deionized water and ethanol repeatedly by  
20 centrifugation, and then freeze-dried for 24 h.

## 21 Synthesis of Copper/Polymer Hybrids

22 40 mg PPy powder was dispersed in 40 ml deionized water and stirred vigorously until well-  
23 dispersed. Then, 71.55 mg copper chloride dihydrate and 400 mg trisodium citrate dihydrate were  
24 dissolved to the dispersion and agitated for 30 min, until homogeneous dark green color was

1 achieved. The mixture was heated to 60°C in a water bath, then 1 ml hydrazine hydrate added, and  
2 kept stirred for another 30 min. The final product was washed by centrifugation with deionized  
3 water and ethanol respectively, and then freeze-dried for 24 h.

#### 4 **Synthesis of Copper/Polymer Hybrids gas diffusion electrodes**

5 YLS-30T carbon paper with hydrophobic microporous layer, which has good hydrophobicity,  
6 is used as the gas diffusion layer of the cathode in this paper. The electrodes were prepared by  
7 spraying catalyst dispersion, and the preparation process was as follows: First cut the carbon paper  
8 to a square size of  $3 \times 3 \text{ cm}^2$  to cover the alkaline flow cell chamber, and soaked in 0.1 M  
9 hydrochloric acid, deionized water, and ethanol for 10 min each to remove the surface impurities of  
10 the carbon paper. The carbon paper was soaked in 0.1 M hydrochloric acid, deionized water and  
11 ethanol for 10 min to remove trace impurities from the surface of the carbon paper, and then dried  
12 in a vacuum drying oven for 24 h. PTFE emulsion was applied to the large pore layer on the back  
13 of the carbon paper and sintered at 300 °C for 1.5 h in a muffle furnace to improve the  
14 hydrophobicity of the carbon paper; the conventional catalyst dispersion consisted of 10 mg of solid  
15 catalyst, 250  $\mu\text{L}$  of deionized water, 710  $\mu\text{L}$  of isopropanol and The conventional catalyst dispersion  
16 consisted of 10 mg of solid catalyst, 250  $\mu\text{L}$  of deionized water, 710  $\mu\text{L}$  of isopropanol and 40  $\mu\text{L}$   
17 of membrane solution Nafion (5 wt%) for 1 h to obtain a homogeneous catalyst dispersion. Prepared  
18 carbon paper is placed on a heated table at 70°C, and the exposed area of carbon paper is controlled  
19 using a custom mold. at  $1 \times 1 \text{ cm}^2$  by using a custom mold, and the dispersion was sprayed onto the  
20 exposed surface of the carbon paper using an airbrush. After the catalyst was fully dried, the mass  
21 of the carbon paper was repeatedly weighed before and after spraying, and the loading of the catalyst  
22 was controlled at  $1 \text{ mg}/\text{cm}^2$ . Finally, the carbon paper was prepared as cathode working electrode  
23 by using copper conductive tape and insulating tape. Nickel foam has a good pore structure to  
24 provide reaction area and good oxygen precipitation reaction (OER) activity. In this paper,  
25 commercial nickel foam treatment with 110 ppi porosity and 0.5 mm thickness was used as the  
26 anode in this paper. The reference electrode was a Ag/AgCl electrode.

## 1 Details of eCO<sub>2</sub>RR testing

2 The eCO<sub>2</sub>RR performance of cathode Cu/PPy, Cu/PTh catalysts was tested using a homemade  
3 flow cell. The reference electrode was a *Ag/AgCl* electrode, the counter electrode was nickel foam,  
4 and the ion exchange membrane was an anion exchange membrane. The flow cell consists of three  
5 chambers: an anodic liquid chamber, a cathodic liquid chamber and a gas flow chamber. The gas  
6 diffusion electrode (GDE) is sandwiched between the cathodic liquid chamber and the gas flow  
7 chamber, with the substrate side facing the gas flow chamber and the catalyst side facing the anion  
8 chamber. The anion exchange membrane (AEM) was sandwiched between the cathode and anode  
9 chambers. The anion solution and cation exchange membrane in all experiments were 20 ml and 20  
10 ml of 1 M KOH aqueous solution, respectively, and all potentials were uncorrected. All potentials  
11 are uncorrected for iR loss. All applied potentials were calculated for RHE according to the  
12 following equation:

$$13 \quad V_{RHE} = V_{versus Ag/AgCl} + 0.059 \times \text{pH} + 0.197 \text{ (1)}$$

14 Liquid products were quantified using nuclear magnetic resonance spectroscopy (NMR). The  
15 yields of the liquid products were accurately detected and quantified using 10 mmol/L DMSO as an  
16 internal standard for NMR detection. Gaseous products are collected in gas bags and pump to GC, 1  
17 mL of CO<sub>2</sub>RR gas product was analyzed using a gas chromatograph (GC, Agilent 8890) equipped  
18 with a thermal conductivity detector (TCD) and a flame ionization detector (FID).

19 Causes of FE loss at high current density of ~800 mA cm<sup>-2</sup>: Firstly, when CO<sub>2</sub> is dissolved in  
20 alkaline electrolyte, the electrode surface produces numerous gas bubbles. Therefore, some of the  
21 gas phase products will enter the cathode chamber electrolyte and leak from the electrolyte without  
22 being completely collected for analysis in gas chromatography (*Nature Communications*, 2023,  
23 14(1): 1158), resulting in the loss of total Faraday efficiency. Secondly, the liquid product is not  
24 fully detected because it passes through the gas diffusion layer and the ion exchange membrane  
25 (*Journal of catalysis*, 2020, 385: 140-145), resulting in a total FE of only ~80% at the current density  
26 >800 mA/cm<sup>2</sup>.

## 1 Characterizations

2 X-ray diffraction (XRD) patterns were acquired with a X-ray diffractometer (Bruker D8  
3 ADVANCE, Germany) using Cu K $\alpha$  radiation. The structures and morphology were  
4 characterized by field emission scanning electron microscopy (FESEM, GeminiSEM 300,  
5 Germany) equipped with energy dispersive X-ray spectroscopy (EDS). The surface elemental  
6 composition and chemical states were measured using X-ray photoelectron spectroscopy (XPS,  
7 Thermo Scientific K-Alpha, America) with an Al K $\alpha$  X-ray source. CO<sub>2</sub> adsorption isotherms  
8 measurements were carried out by using an automatic microporous physical and chemical gas  
9 adsorption analyzer (ASAP2020, America).

## 10 DFT details

11 DFT calculations were performed by the MedeA-Vienna Ab initio Simulation Package  
12 (VASP). The GGA-rPBE generalized gradient approach was used to define the exchange-  
13 correlation potential.<sup>1, 2</sup> The interaction between the atomic cores and electrons was described by  
14 using the projector augmented wave method (PAW).<sup>3, 4</sup> The plane wave energy cutoff was set to be  
15 400 eV. The Brillouin zone in the real space was sampled with a  $2 \times 2 \times 1$  Monkhorst-Pack K-point  
16 grid. The convergence criterion was set to be 10<sup>-5</sup> eV and 0.05 eV/Å for energy and force in the  
17 geometry optimizations, respectively. A Gaussian smearing method was employed with 0.1 eV  
18 width. Hubbard-U correction method (DFT+U) was carried out to improve the description of highly  
19 correlated Cu 3d orbitals with the value of U-J set to be 2.5 eV.

20 The detailed Gibbs free energy has been calculated according to the following equation:

$$21 \quad G = E + ZTE - TS + G_{pH} + eU \quad (2)$$

22 Where G, E and ZTE refer to chemical Gibbs free energy, electronic energy and zero-point  
23 energy, respectively.  $G_{pH}$  is the free energy correction of pH, and can be calculated by:

$$24 \quad G_{pH} = K_B T \times pH \times \ln 10 \quad (3)$$

25 Notably, the pH value was set to be zero and fourteen in this work; U was the applied potential.<sup>5</sup>

26 The entropy can be calculated by the sum of the vibrational, rotational, translational, and electronic

1 contribution as to:

$$2 \quad S = S_v + S_r + S_t + S_e \quad (4)$$

3 Since  $S_e \approx 0$  at the fundamental electronic level.

4 For the case of solids and adsorbates, some approximations can be adopted: Translational and  
5 rotational motions can be omitted, therefore,  $S_t \approx 0$  and  $S_r \approx 0$ . In this case, all the entropy values come  
6 from the vibrational contribution:  $S = S_v$ .

7 Finally, Gibbs free energy for different states was calculated as to:

$$8 \quad G = E + ZTE - TS_v + G_{pH} + eU \quad (5)$$

## 9 **Durability measurements**

10 Durability was measured using a FLOW-CELL device with 1M KOH as the electrolyte. The  
11 catalyst area was  $0.5\text{cm}^2$  and the test was conducted at a constant current of 100mA.

## 12 **Four-electrode AC impedance model**

13 To exclude the interference of GDL conductivity, we use an insulating substrate-loaded  
14 catalyst layer to improve the impedance signal-to-noise ratio. We pressed four silver wires as  
15 electrodes on the surface of the catalyst layer, applied an alternating current to the surface of the  
16 catalyst layer through the outer silver wire electrodes, and then collected the voltage drop across the  
17 intermediate silver wires, the four-electrode method can exclude the interference of the external  
18 impedance of the catalyst layer<sup>6</sup>. The experiments were conducted to reduce the catalyst layer in a  
19 wetted state, and the catalyst layer was wetted with deionized water prior to testing and removed so  
20 that there were no visible water droplets on the surface, and the default catalyst layer humidity was  
21 a maximum of 98% RH. The AC impedance method was used to characterize the temperature-  
22 dependent dual conductivity of the polymers, and the instrument was a Chenhua 760e  
23 electrochemical workstation. The impedance spectra were tested at different temperatures (40°C,  
24 50°C, 60°C, 70°C, 80°C), stabilised for at least 10 min at each temperature prior to the test and the  
25 test was repeated twice, with the impedance test frequency ranging from 100 KHz-1 Hz.

1 The system can be viewed as a parallel connection of an electronic impedance element and an  
 2 ionic impedance element, and the low-frequency AC current is equivalent to a DC voltage driving  
 3 the electronic operation. The low-frequency AC current is equivalent to a DC voltage driving the  
 4 electrons, and the equivalent circuit can be regarded as the only electronic impedance element. In  
 5 the case of high-frequency AC, both electrons and ions can move back and forth under AC voltage.  
 6 In the case of high-frequency AC, both electrons and ions can move back and forth under the AC  
 7 voltage, and the measured impedance includes both electronic and ionic transfer parts. The  
 8 equivalent circuit can be seen as a parallel connection of the ionic impedance and the electronic  
 9 impedance (**Fig. S23b**). The corresponding formula for calculating conductivity is given below:

$$10 \quad \sigma = \frac{L}{\omega \times t \times R} \quad (6)$$

11 where  $\sigma$  is the electrical conductivity (S/cm or mS/cm); L is the distance between the two silver  
 12 wire electrodes;  $\omega$  is the width of the catalyst layer (cm); t is the thickness of the catalyst layer (cm,  
 13 observed by SEM); R is the impedance ( $\Omega$ , derived by fitting the equivalent circuit); the high-  
 14 frequency impedance includes both the ionic and electronic impedance components:

$$15 \quad R_{ionic} = \frac{1}{\frac{1}{R_{high}} - \frac{1}{R_{electronic}}} \quad (7)$$

16 where  $R_{electronic}$  is the electronic impedance ( $\Omega$ , equal to the low frequency impedance  $R_{low}$ );  
 17  $R_{high}$  is the high frequency impedance ( $\Omega$ );  $R_{ionic}$  is the ionic impedance ( $\Omega$ , from Equation 6).  
 18 Arrhenius equation

$$19 \quad \sigma = \sigma_0 \exp\left(-\frac{E_a}{k_B T}\right) \quad (8)$$

20 where  $\sigma$  is the electronic conductivity (S/cm);  $\sigma_0$  is the prefactor;  $E_a$  is the thermal activation  
 21 energy (eV);  $k_B$  is the Boltzmann constant; T is the absolute temperature (K).

$$22 \quad \sigma T = A \exp\left(-\frac{E_a}{k_B T}\right) \quad (9)$$

23 where  $\sigma$  is the proton conductivity (S/cm); T is the absolute temperature (K); A is the the pre-  
 24 exponential factor.;  $E_a$  is the activation energy for proton conductivity (eV);  $k_B$  is the Boltzmann

1 constant.

## 2 MD Simulation details

3 All the MD simulations were performed by using the Accelrys Materials Studio 7.0 software  
4 package. The simulation box was generated by a random distribution of polymer chains consisting  
5 of 20 conductive polymer monomers. These polymer chains are individually energy-minimized and  
6 geometrically optimized before the simulated boxes are created. Energy minimization and  
7 geometric optimization are performed by conjugate gradient method.

8 The simulations were performed at 298 K and a periodic boundary condition with an initial  
9 density of 0.8 g/cm<sup>3</sup>. The initial configuration of the simulation box is first minimized to reduce  
10 energy and eliminate overlaps and close contacts. And then the structure in the simulated box is  
11 geometrically optimized. After completing these steps, the cell density and energy remain constant,  
12 indicating that the system has reached equilibrium. After equilibration, the production run was  
13 performed at 298 K for 500 ps NVT. All MD simulations were performed by using the Ewald  
14 summation method<sup>7, 8</sup> with a fine accuracy of 1.0e-5 kcal/mol for both equilibrium phases and  
15 production runs. Nose thermostats and barometers are used to control the temperature and pressure  
16 in the simulation process<sup>9</sup>. During the MD simulation, the time step of the NVT ensemble was 1.0  
17 fs.

18 **Force field.** The COMPASS (Condensed Phase Optimized Molecular Potential for Atomistic  
19 Simulation Studies) force field<sup>10</sup> is widely acknowledged for its effectiveness in modeling  
20 interactions, particularly in the fields of molecular dynamics and ab initio simulations. The total  
21 potential energy in this force field is given by the following equation:

$$\begin{aligned} E_{total} &= E_{valence} + E_{crossterm} + E_{non-bonded} \\ &= E_b + E_\theta + E_\phi + E_\chi + E_{bb'} + E_{b\theta} + E_{b\phi} + E_{\theta\theta'} + E_{\theta\theta'\phi} + E_{elec} + E_{LJ} \end{aligned} \quad (10)$$

24 where the valence term  $E_{valence}$  denotes molecular interactions which includes: bond ( $E_b$ ), angle  
25 ( $E_\theta$ ), torsion ( $E_\phi$ ) and out of plane angle ( $E_\chi$ ). The cross-coupling term  $E_{crossterm}$  in Equation (1)  
26 includes the following interactions terms: bond-bond ( $E_{bb'}$ ), bond-angle ( $E_{b\theta}$ ), bond-torsion ( $E_{b\phi}$ ),



1 angle-angle ( $E_{\theta\theta}$ ) and angle-angle-torsion ( $E_{\theta\theta\phi}$ ). The cross-coupling term  $E_{\text{crossterm}}$  is important for  
 2 predicting vibrational frequencies and structural changes associated with conformational changes.  
 3 The non-bonded term  $E_{\text{non-bonded}}$ , includes the electronic interaction ( $E_{\text{elec}}$ ), which is represented by  
 4 Coulombic and Lenard-Jones 9-6 ( $E_{\text{LJ}}$ ) potential for the vander Waals (vdW) interactions.

5 **Mean square displacement (MSD).** The diffusion coefficient is related to the vehicular  
 6 mechanism, and the water diffusion coefficient ( $D$ ) can be calculated from the mean-square  
 7 displacement (MSD) and Einstein's diffusion equation in the following forms<sup>11</sup>:

$$8 \quad MSD = \{[R(t) - R(0)]^2\} \quad (11)$$

$$9 \quad D = \frac{1}{6} \lim_{t \rightarrow \infty} \left\{ \frac{[R(t) - R(0)]^2}{t} \right\} = \frac{1}{6} \lim_{t \rightarrow \infty} \frac{dMSD}{dt} \quad (12)$$

10 where  $R(t)$  and  $R(0)$  are the positions to which the species (water and hydrated hydrogen ions)  
 11 diffuse at time  $t$  and initial time ( $t=0$ ) of the MD simulation, respectively. The relationship between  
 12 the conductivity and diffusion coefficient ( $D$ ) of water molecules and hydrated hydrogen ions is  
 13 expressed as:

$$14 \quad \sigma = \frac{Dne^2}{kT} \quad (13)$$

15 where  $k$ ,  $n$ ,  $T$  and  $e$  are the Boltzmann constant, the number of molecules per cell volume, the Kelvin  
 16 temperature and the elementary charge, respectively.

17 **Radial distribution function (RDF).** By evaluating the radial distribution function  $g_{(A-B)}(r)$ , it is  
 18 possible to determine whether there is a molecular moiety from one cluster near another molecular  
 19 moiety in a different cluster. This function represents the probability of finding an atom  $B$  at a  
 20 distance  $r$  from atom  $A$  in the MD trajectory and is an average over all MD trajectories. The  
 21 mathematical expression for this function is as follows<sup>12, 13</sup>:

$$22 \quad g_{A-B} = \left( \frac{n_B}{4\pi r^2 \Delta r} \right) / \left( \frac{N_B}{V} \right) \quad (14)$$

23 where  $n_B$  is the number of atoms  $B$  located at distance  $r$  around atom  $A$  and in a shell of  
 24 thickness  $\Delta r$ .  $N_B$  and  $V$  are the total number of atoms  $B$  and the total volume of the system,

1 respectively.

## 2 **SECM Measurements**

3       The SECM device is shown in **Fig. S27a** , it illustrates that the surface of Pt-UME is smooth  
4 enough for detection and radius of Pt is about 13  $\mu\text{m}$ . RG (ratio of overall probe diameter to active  
5 electrode diameter) of the electrode is 3.4, which is suitable for SECM (Fig. S23b). Blank  
6 voltammetry (Fig. S23c) shows the expected voltammetric features of a clean polycrystalline  
7 platinum surface. The diffusion-limited steady-state current of Pt-UME (Fig. S23d) resulting from  
8 the  $\text{FcMeOH}/[\text{FcMeOH}]^+$  redox couple. The Pt-UME radius can be calculated through equation  
9 (14):

10 
$$i = 4nFDCa \quad (15)$$

11       where  $i$  is diffusion-limited steady-state current ( $i=3.5 \text{ nA}$ ),  $n$  is the number of electrons  
12 transferred per molecule ( $n=1$ ),  $F$  is the Faraday constant ( $F=96485 \text{ Cmol}^{-1}$ ),  $D$  is the diffusion  
13 coefficient of  $\text{FcMeOH}$  ( $D=6.67 \times 10^{-10} \text{ m}^2 \text{ s}^{-1}$ ),  $a$  is the radius of UME, and  $C$  is the concentration  
14 of  $\text{FcMeOH}$  ( $C=0.9 \text{ mM}$ ). The radius is calculated to be 13.3  $\mu\text{m}$ , which is consistent with the optical  
15 size.

16

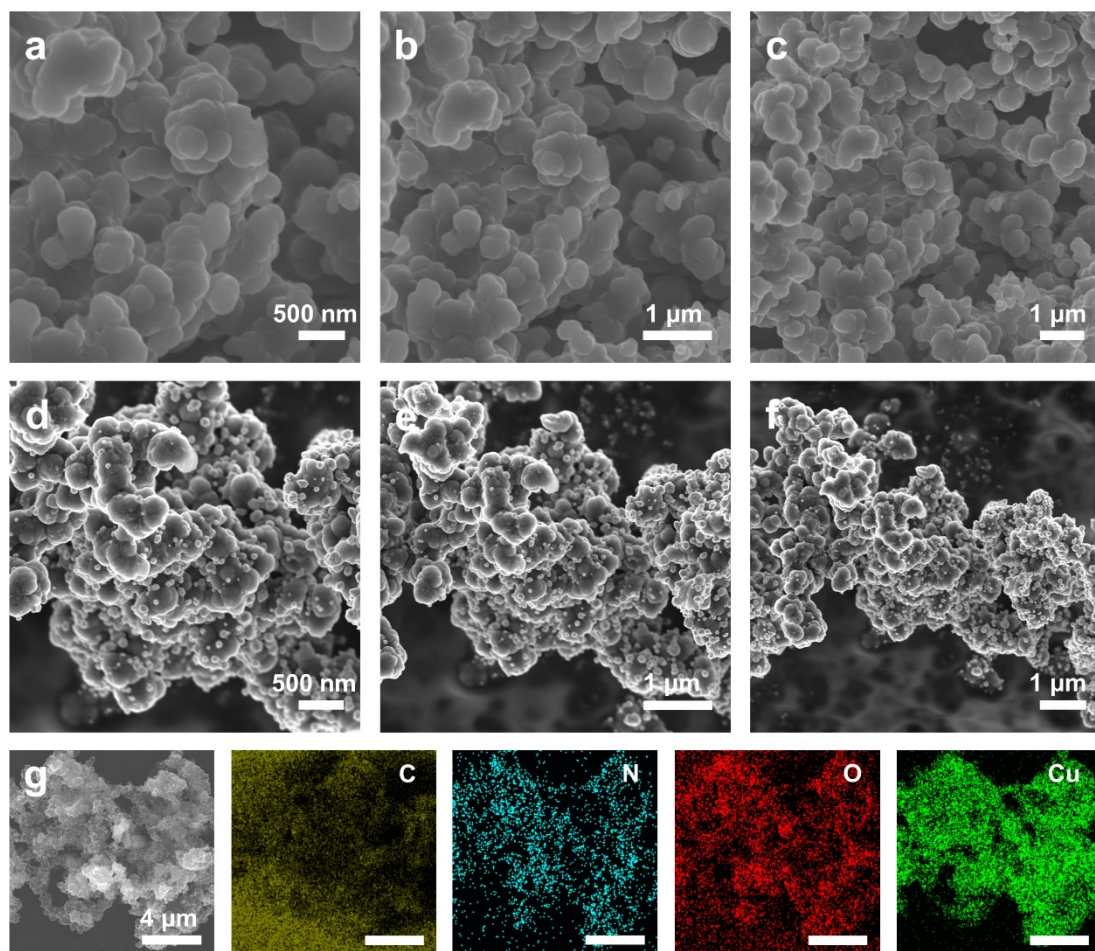

1

2 **Fig. S1** (a-c) SEM images of pure PPy and (d-f) Cu/PPy; (g) SEM image of its EDS mapping images of  
 3 C, N, O, Cu elements of Cu/PPy.

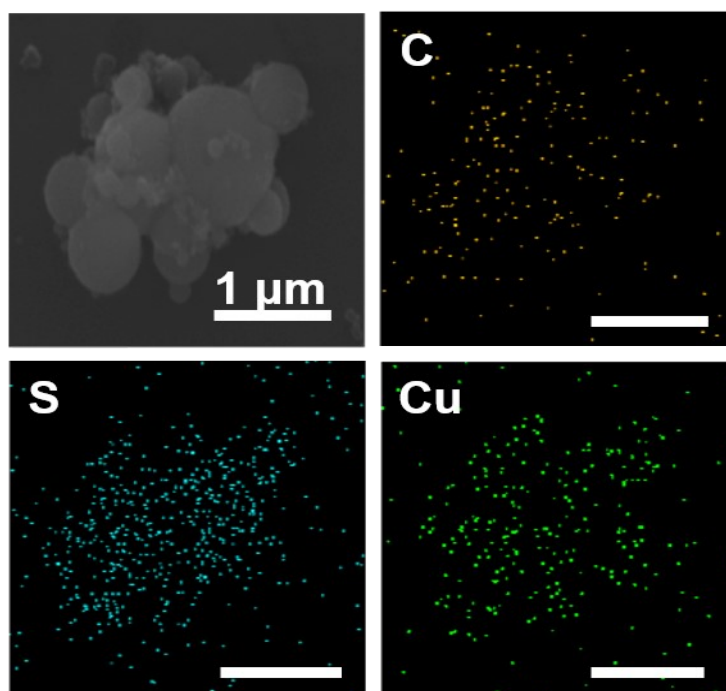

**Fig. S2** SEM and its EDS images of C, S, Cu elements in Cu/PTH.

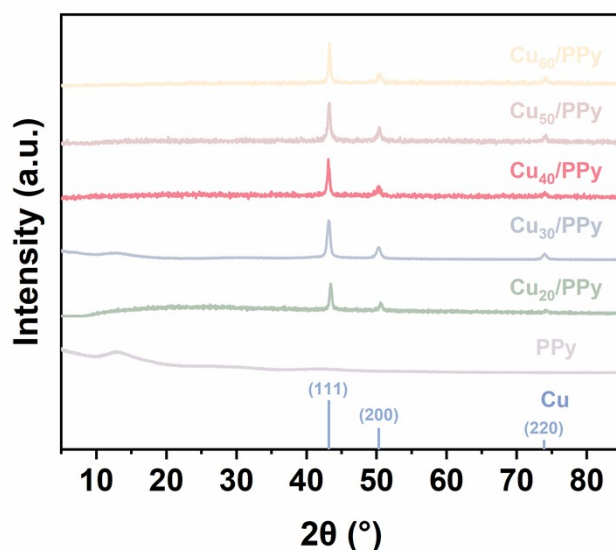

**Fig. S3** XRD patterns of Cu/PPy composites with different Cu loadings.

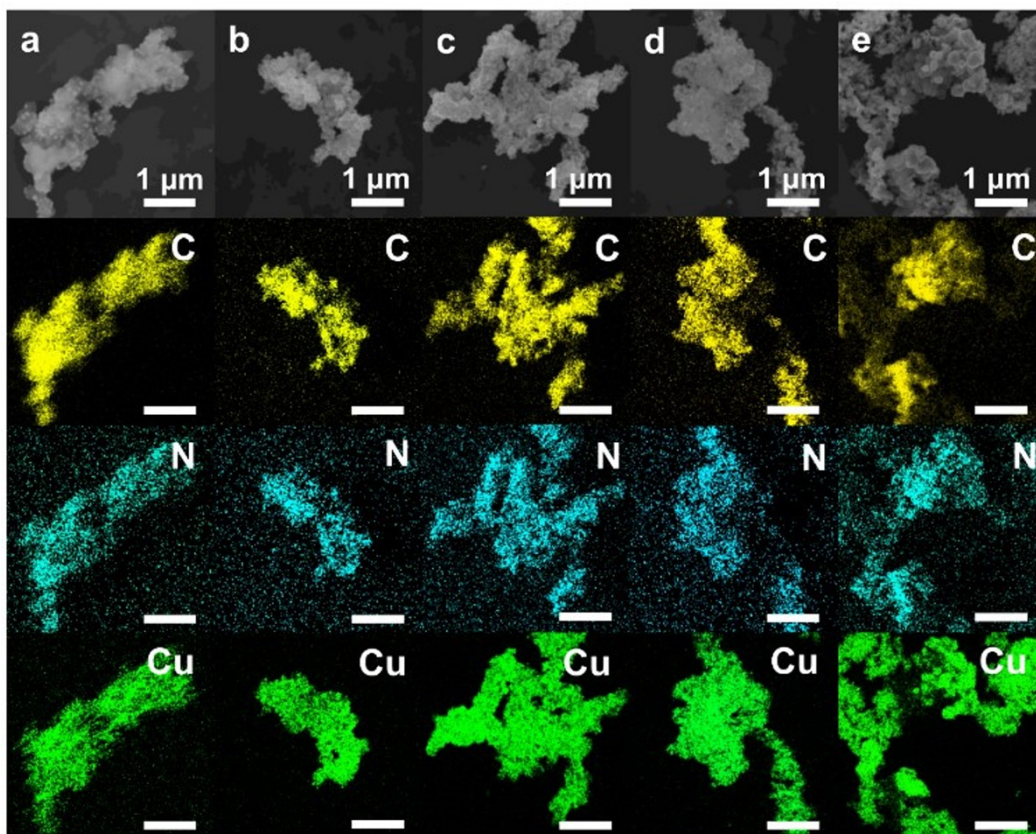

1

2 Fig. S4 SEM and the EDS mapping images of C, N and Cu elements in (a) Cu<sub>20</sub>/PPy; (b) Cu<sub>30</sub>/PPy; (c)

3 Cu<sub>40</sub>/PPy; (d) Cu<sub>50</sub>/PPy; (e) Cu<sub>60</sub>/PPy.

4

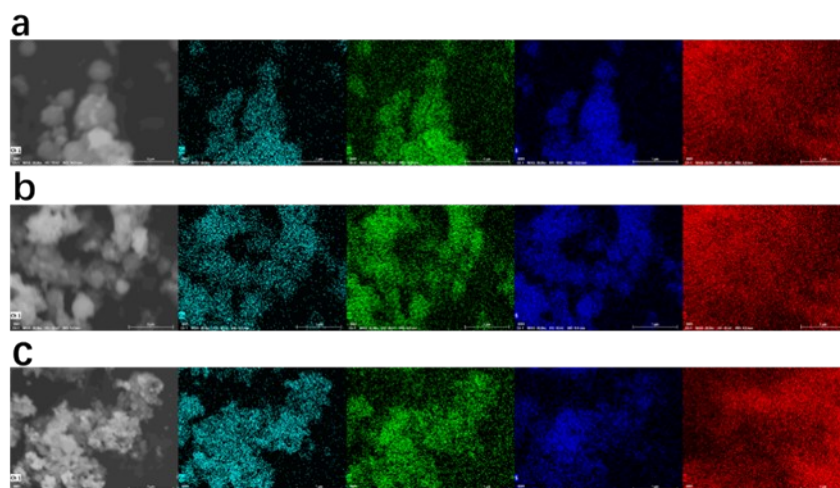

1

2 **Fig. S5** SEM and the EDS mapping images of Cu, O, S and C elements in (a) Cu<sub>20</sub>/PTh; (b) Cu<sub>40</sub>/PTh;

3 (c) Cu<sub>60</sub>/PTh.

4

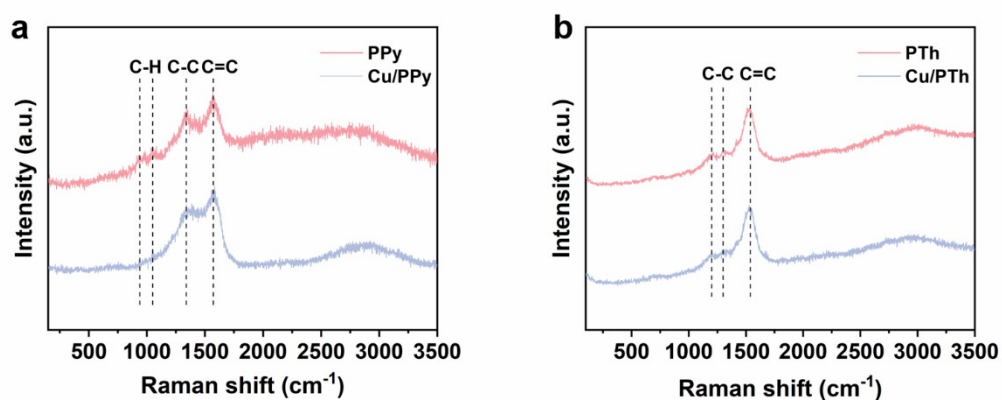

**Fig. S6** Raman spectra of (a) PPy, Cu/PPy; (b) PTh and Cu/PTh.



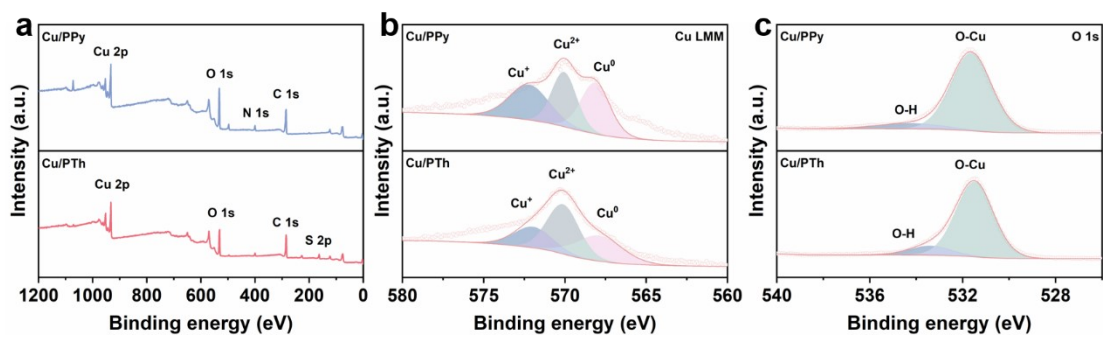

**Fig. S7** XPS spectra of (a) the survey scan, (b) Cu LMM and (c) O 1s of Cu/PPy and Cu/PTh.



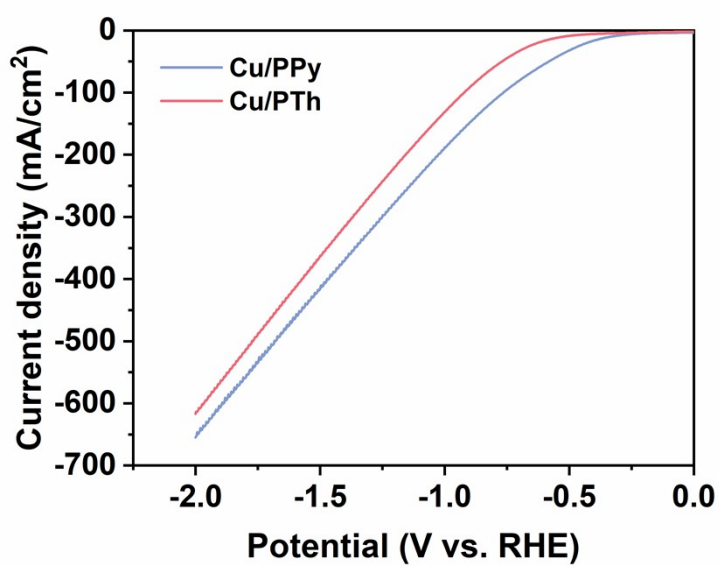

Fig. S8 Linear sweep voltammetry of Cu/PPy and Cu/PTh

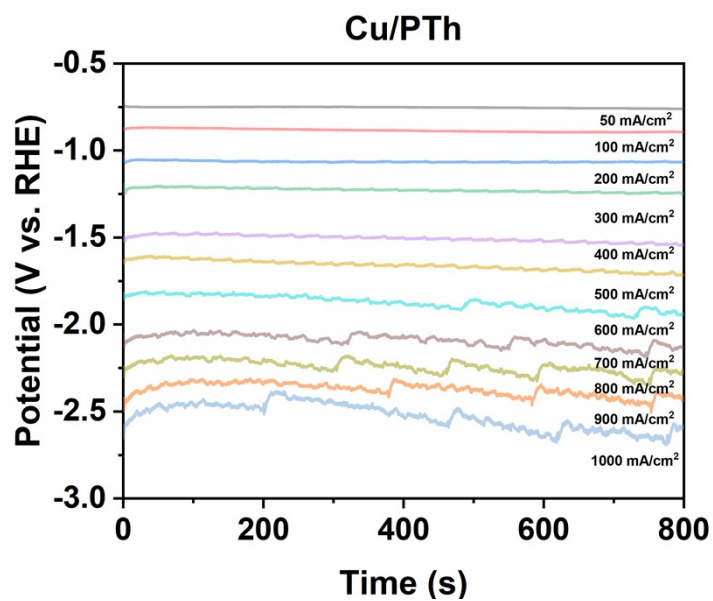

1  
2 **Fig. S9** The chronoamperometry testing of eCO<sub>2</sub>RR promoted by Cu/PTh at the current density of 50,  
3 100, 200, 300, 400, 500, 600, 700, 800, 900, 1000 mA cm<sup>-2</sup>.  
4

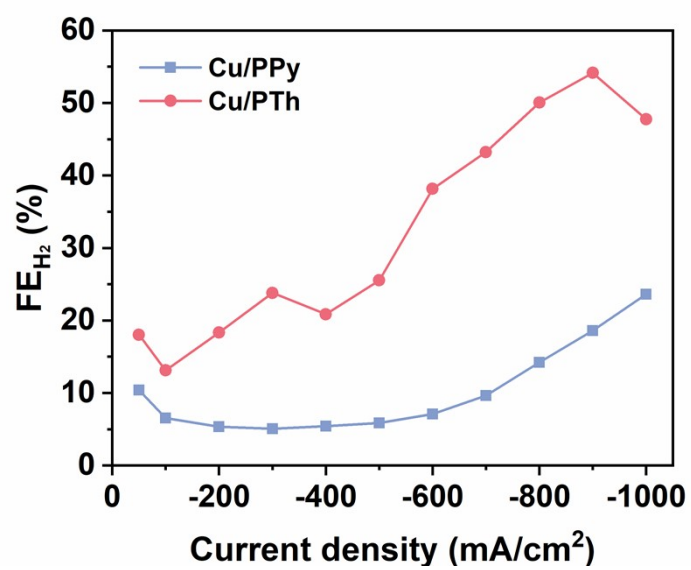

**Fig. S10** Faraday efficiency of H<sub>2</sub> at different current densities.

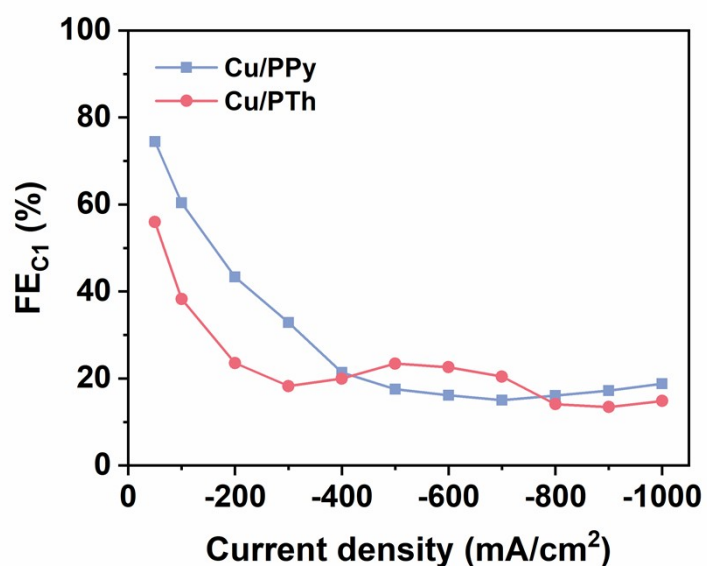

**Fig. S11** Faraday efficiency of C<sub>1</sub> products at different current densities.

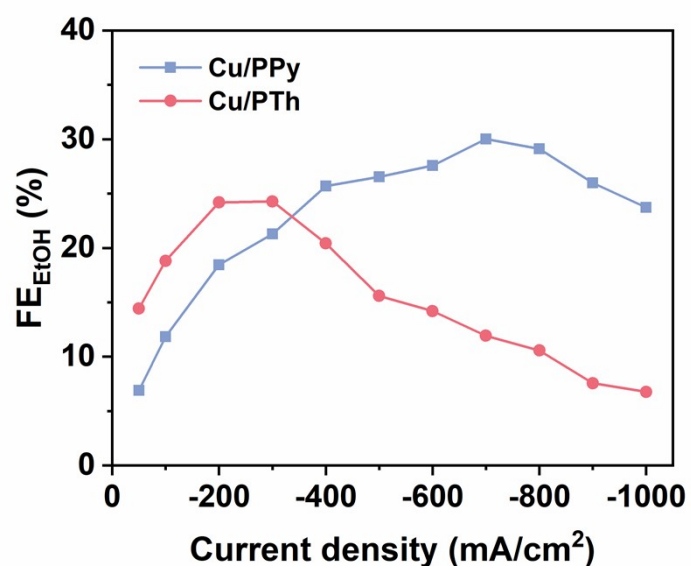

**Fig S12** Faraday efficiency of the EtOH product at different current densities.

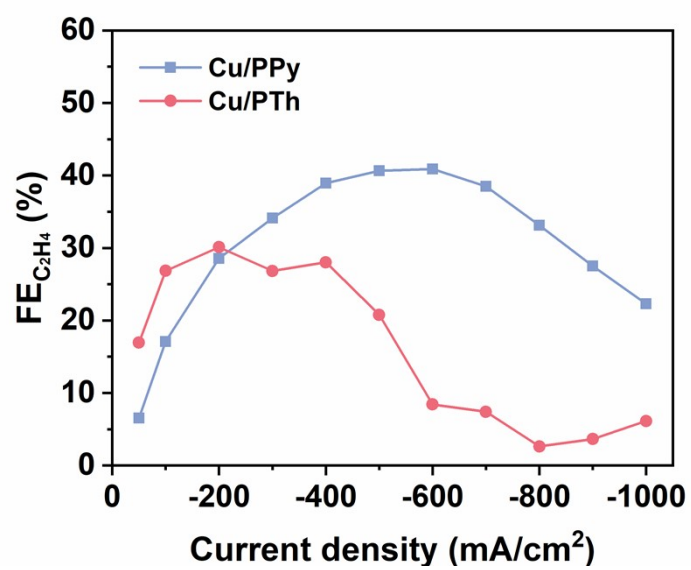

**Fig. S13** Faraday efficiency of the  $C_2H_4$  product at different current densities.

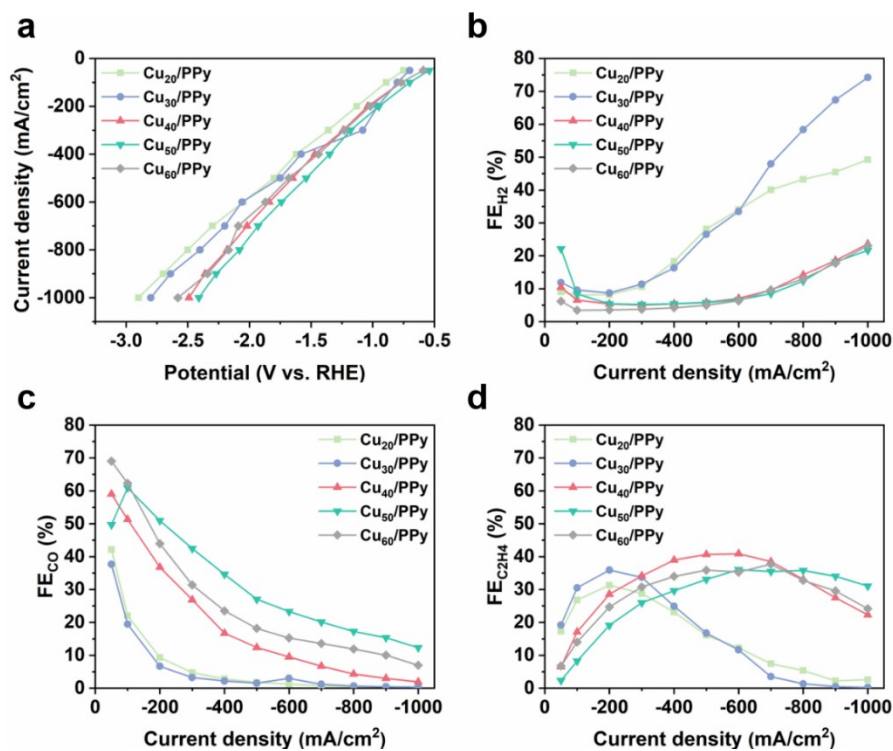

1

2 **Fig. S14** (a) Polarization curves plotted using the steady-state current density and applied potentials;

3 (b-d) Faraday efficiency of H<sub>2</sub>, CO, C<sub>2</sub>H<sub>4</sub> of eCO<sub>2</sub>RR promoted by Cu<sub>x</sub>/PPy electrodes.

4

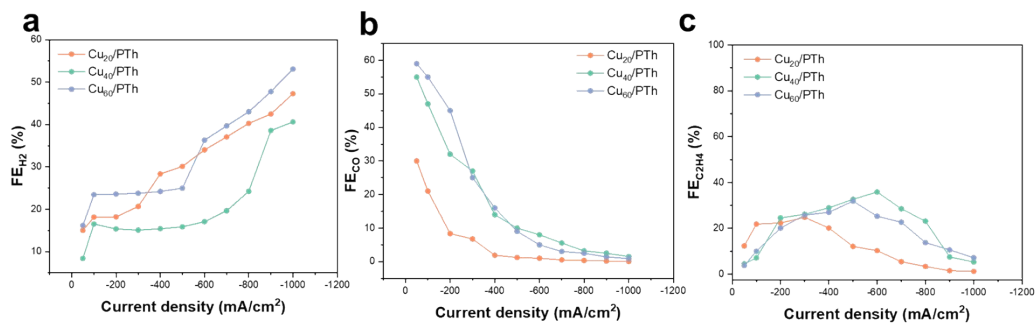

**Fig. S15** (a-c) Faraday efficiency of H<sub>2</sub>, CO, C<sub>2</sub>H<sub>4</sub> of eCO<sub>2</sub>RR promoted by Cu<sub>x</sub>/PTh electrodes.



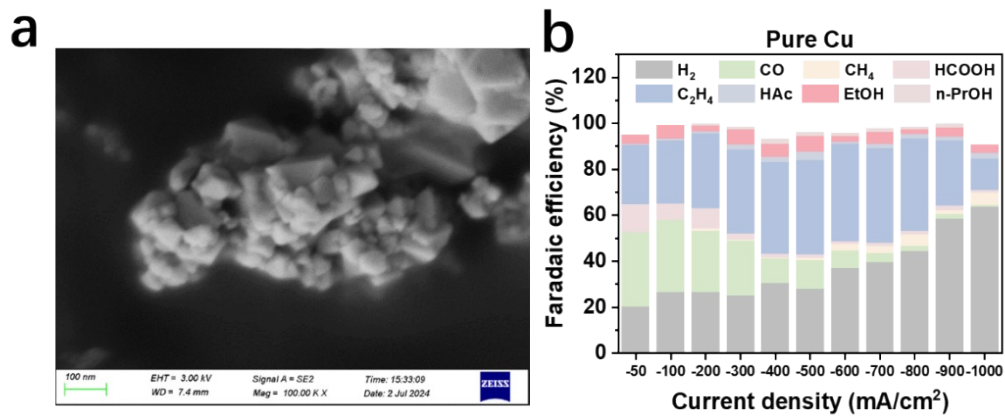

**Fig. S16** (a) SEM images of Pure Cu; (b) CO<sub>2</sub> electroreduction performance of Cu.

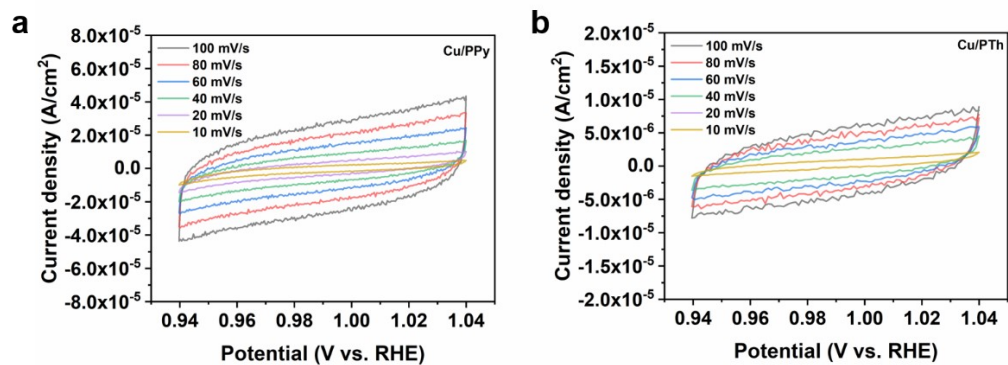

1

2 **Fig. S17** CV curves tested of in the range of 0.94 to 1.04 V (vs RHE) scanned using different sweep  
3 speeds of eCO<sub>2</sub>RR promoted using the Cu/PPy and Cu/PTh electrode.

4

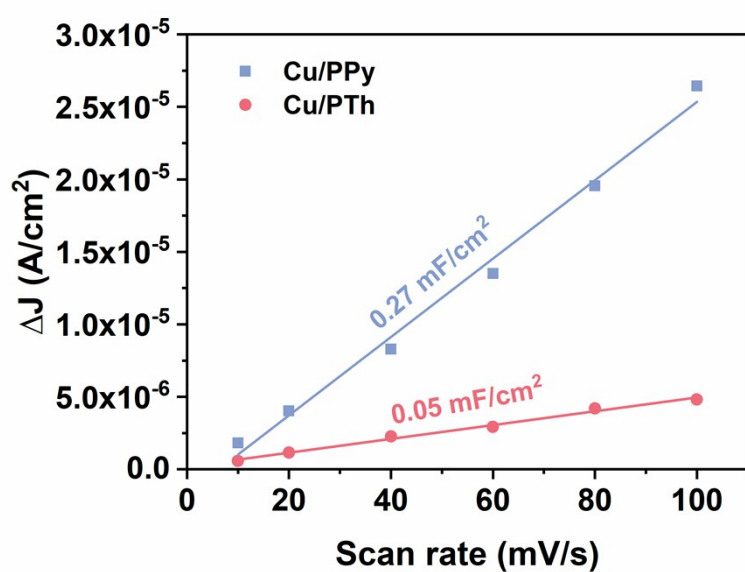

1

2 **Fig. S18** Capacitance tested at different scan rates and the linear fitting for the eCO<sub>2</sub>RR catalyzed by

3 Cu/PPy and Cu/PTh.

4

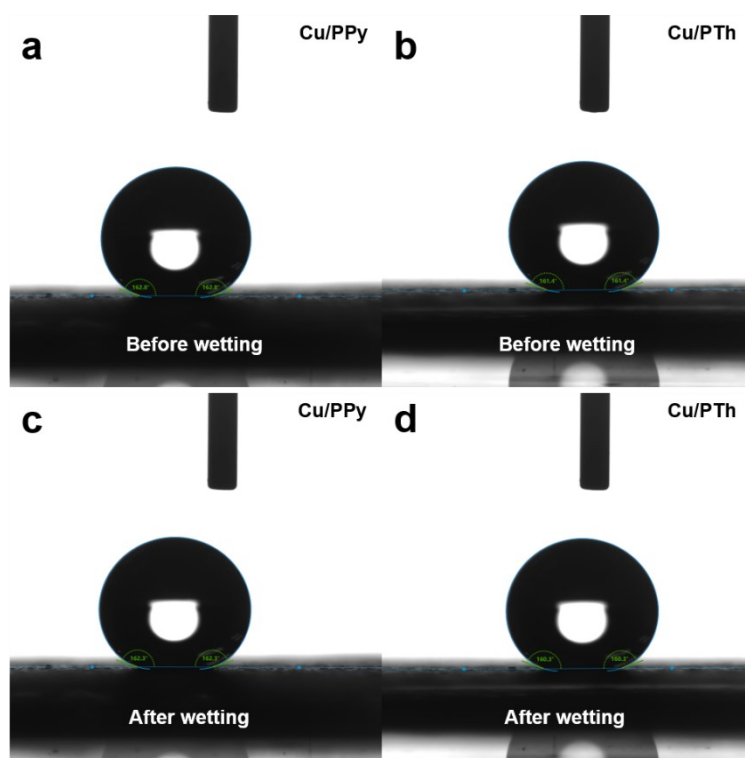

**Fig. S19** Static contact angles before and after wetting of the Cu/PPy and Cu/PTh electrode.

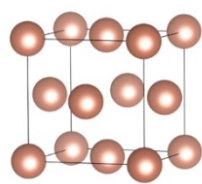

**Cu single cell**

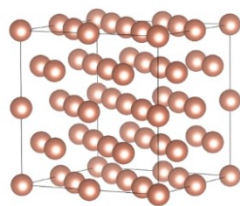

**Enlarged Cu cell**

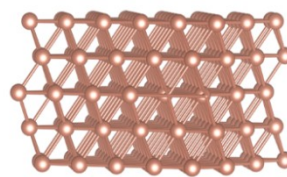

**Cu surface**

**Fig. S20** The configuration of crystal cells and the (111) surface of Cu crystals.

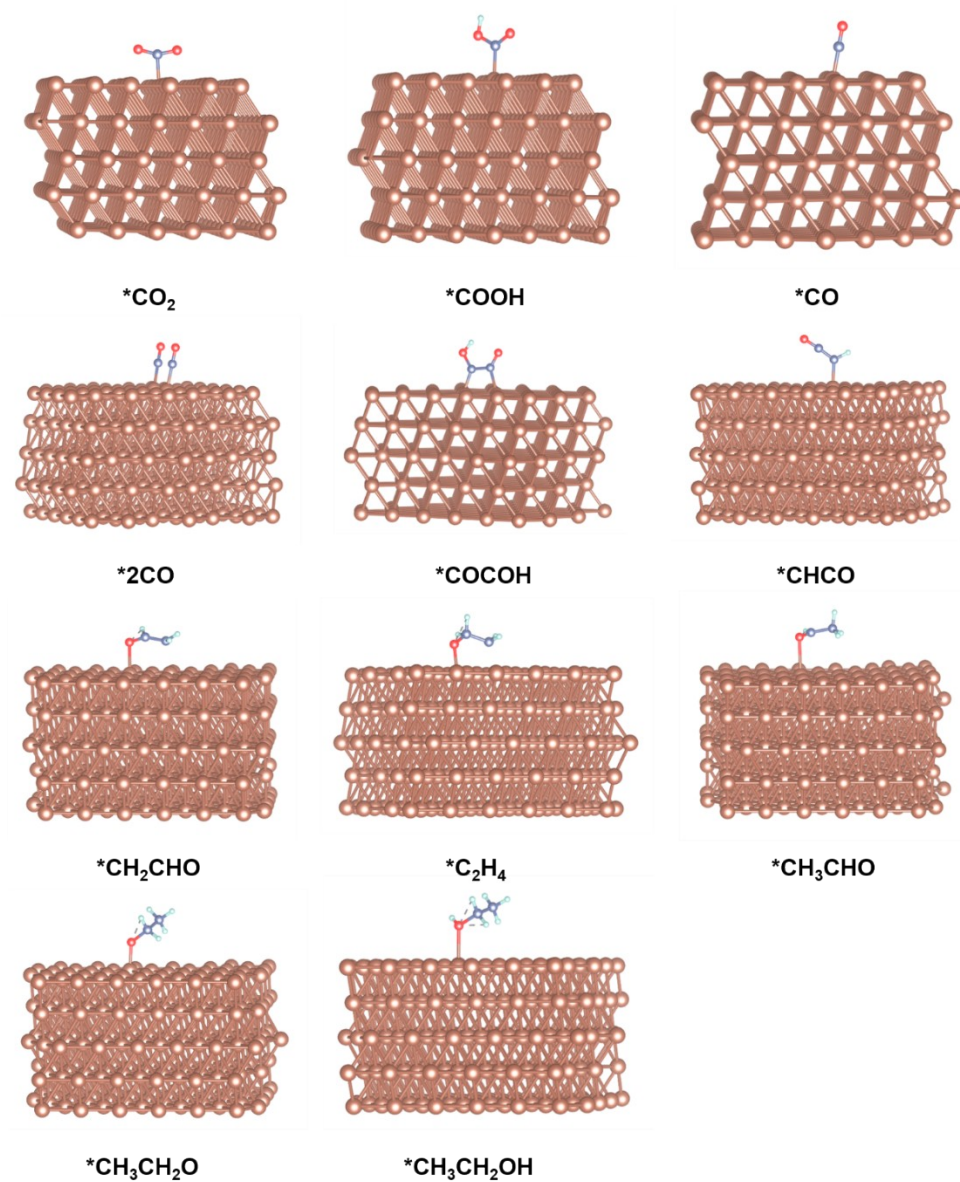

**Fig. S21** Schematic diagrams of intermediates adsorbed on the Cu/PPy surface.

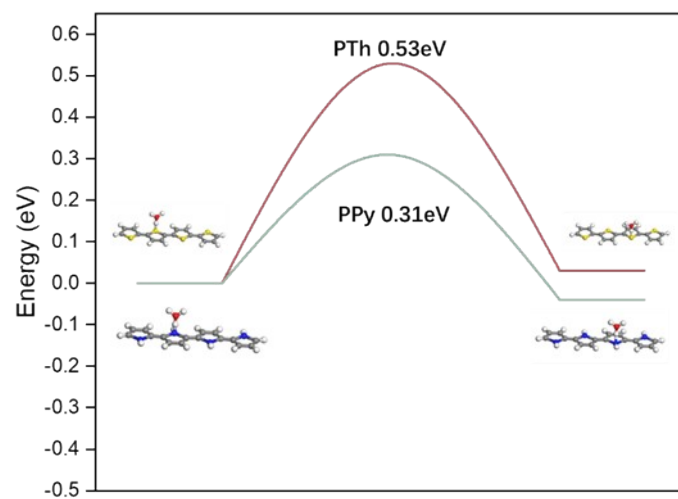

**Fig. S22** Energy barriers of transition state for  $\text{H}_3\text{O}^+$  jumping on PTh & PPy.

1

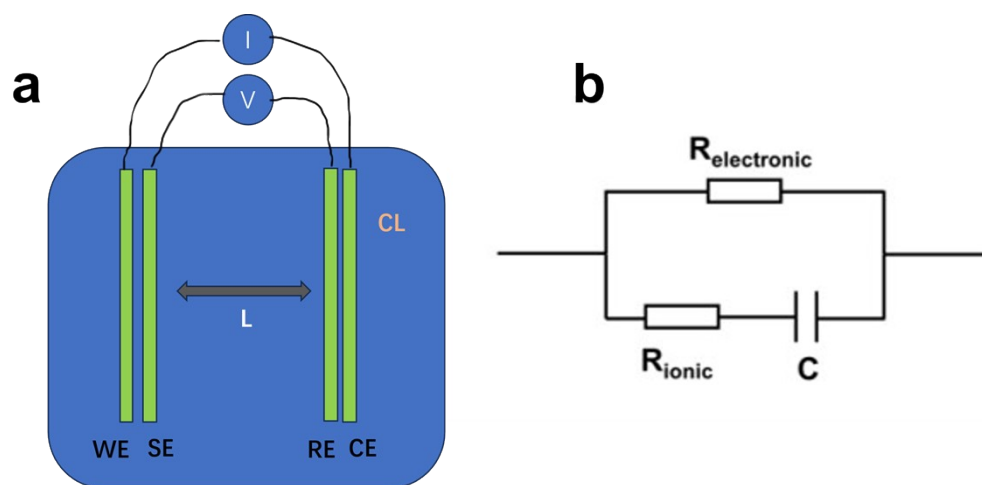

2

3 **Fig. S23** (a) Schematic diagram of a four-electrode device; (b) A fitted equivalent circuit.

4



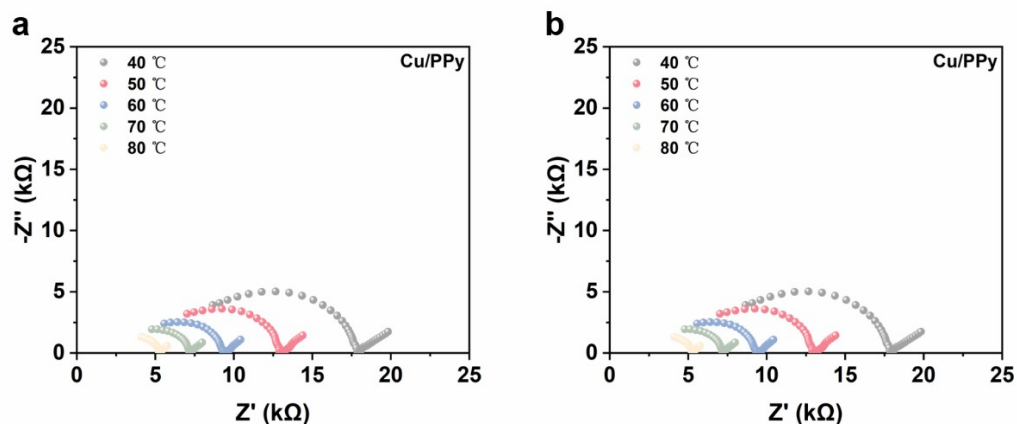

1

2 **Fig. S24** Nyquist plots of eCO<sub>2</sub>RR promoted by Cu/PPy and Cu/PTh tested at different temperatures.

3

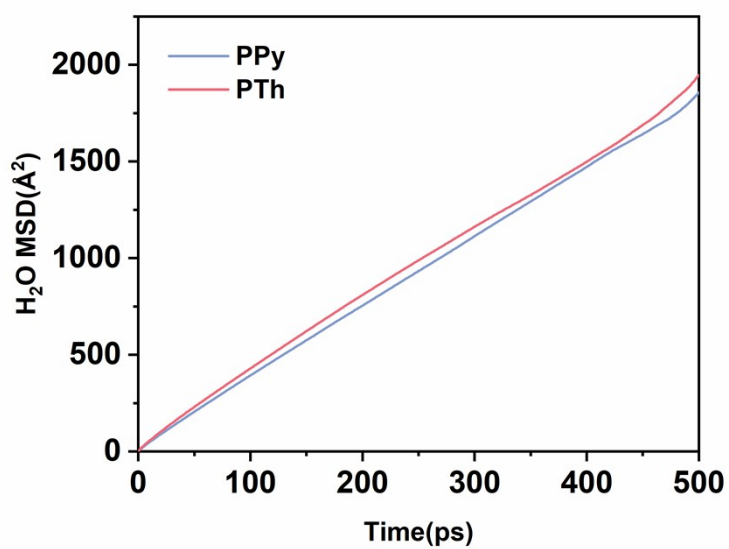

1

2

**Fig. S25** MSD of the water molecule in the eCO<sub>2</sub>RR system using Cu/PPy and Cu/PTh.

3

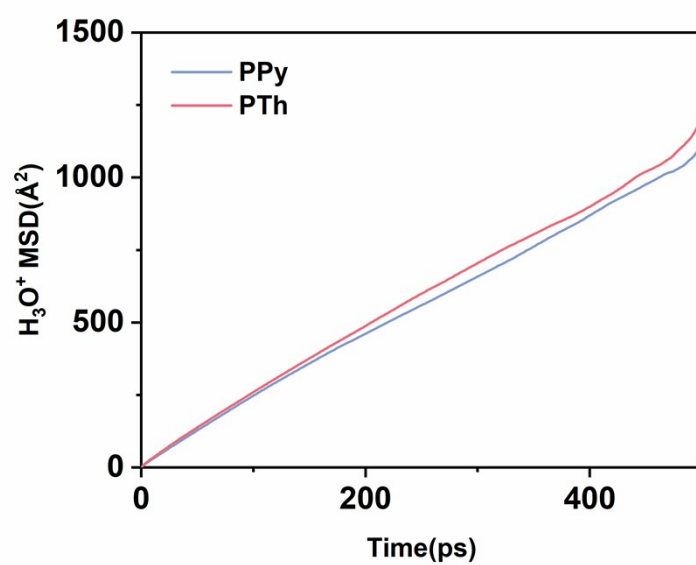

1

2

**Fig. S26** MSD of the hydronium ion in the eCO<sub>2</sub>RR system using Cu/PPy and Cu/PTh.

3

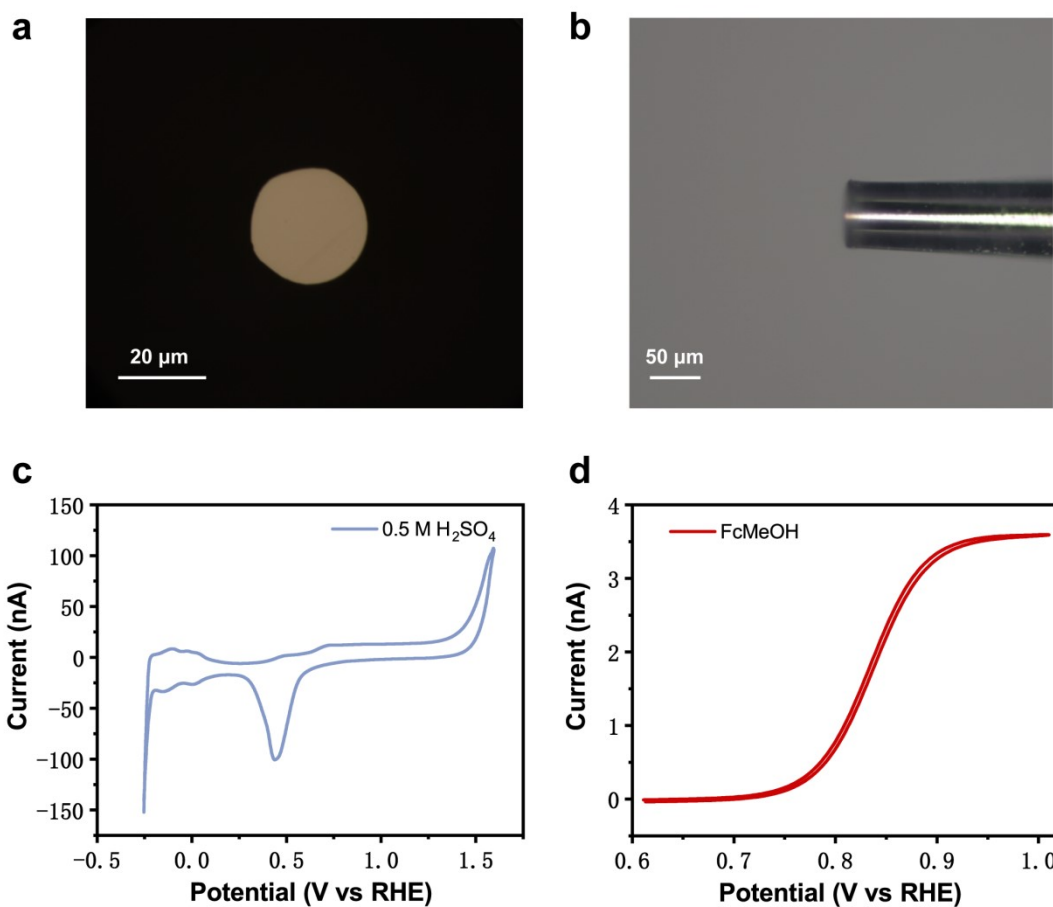

1  
2 **Fig. S27** (a) Top view and (b) side view of optical microscope images of Pt-UME; (c) Blank voltammetry  
3 of the polished Pt-UME used to perform the experiments taken in 0.5 M  $\text{H}_2\text{SO}_4$  at the scan rate of 0.1  $\text{V}$   
4  $\text{s}^{-1}$ ; (d) CV of the steady-state current of Pt-UME obtained in 0.9 mM FcMeOH and 0.1 M KCl at the  
5 scan rate of 0.005  $\text{V s}^{-1}$ .  
6

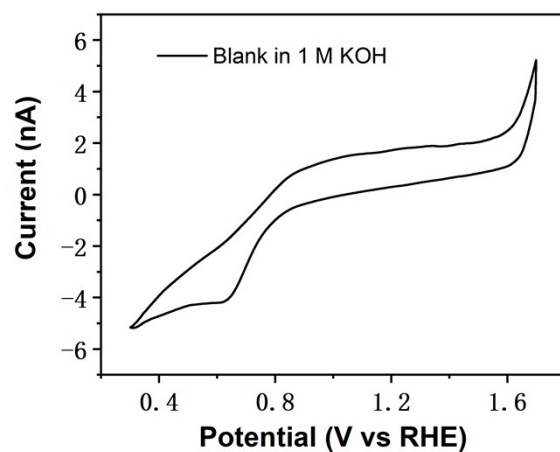

1

2 **Fig. S28** Blank voltammogram of the Pt-UME in CO<sub>2</sub>-saturated 1 M KOH at the scan rate of 0.05 V s<sup>-1</sup>.

3 No oxidation peaks of CO and H<sub>2</sub> were observed.

4

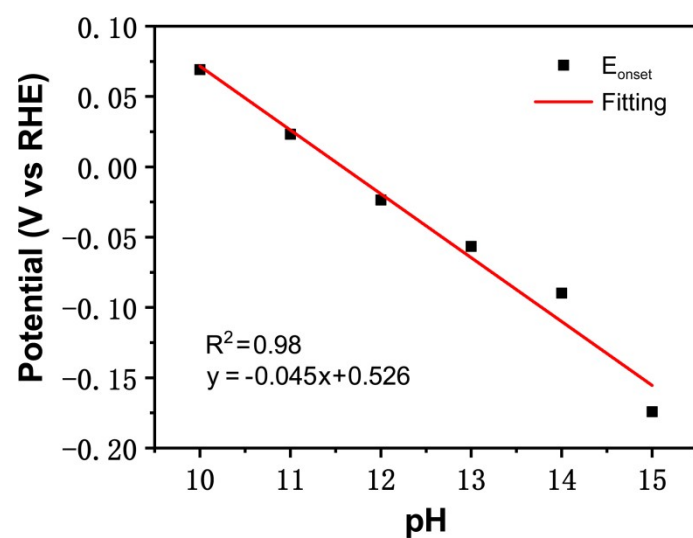

1

2 **Fig. S29** The standard curve of local pH and HER  $E_{\text{onset}}$  in different pH solutions. The  $E_{\text{onset}}$  and pH are

3 linearly related, suggesting that local pH can be obtained from changes in  $E_{\text{onset}}$ .

4

1

**Table S1** Loadings of Cu<sub>x</sub>/PPy composites

| Sample                | CuCl <sub>2</sub> ·2H <sub>2</sub> O (mg) | Theoretical load of Cu (wt%) |
|-----------------------|-------------------------------------------|------------------------------|
| PPy                   | 0                                         | 0                            |
| Cu <sub>20</sub> /PPy | 26.732                                    | 20                           |
| Cu <sub>30</sub> /PPy | 46.018                                    | 30                           |
| Cu <sub>40</sub> /PPy | 71.549                                    | 40                           |
| Cu <sub>50</sub> /PPy | 107.323                                   | 50                           |
| Cu <sub>60</sub> /PPy | 160.986                                   | 60                           |

2

3

1 **Table S2** Quantification of Cu wt% by ICP-OES of Cu<sub>x</sub>/PPy and Cu<sub>x</sub>/PTh composites

2

| Sample                | Cu (wt%)     |
|-----------------------|--------------|
| Cu <sub>20</sub> /PPy | 21.93        |
| Cu <sub>30</sub> /PPy | 28.97        |
| Cu <sub>40</sub> /PPy | <b>48.76</b> |
| Cu <sub>60</sub> /PPy | 69.80        |
| Cu <sub>80</sub> /PPy | 83.97        |
| Cu <sub>20</sub> /PTh | 30.37        |
| Cu <sub>40</sub> /PTh | <b>51.47</b> |
| Cu <sub>60</sub> /PTh | 88.1         |

3

4

5



1

**Table S3** Comparison of eCO<sub>2</sub>RR performance of related samples

| Samples                                       | System    | FE of C <sub>2+</sub><br>(%) | Current density<br>(mA/cm <sup>2</sup> ) | Ref.      |
|-----------------------------------------------|-----------|------------------------------|------------------------------------------|-----------|
| Cu/PPy                                        | Flow-cell | 80.0                         | 700                                      | This work |
| Cu-Cu <sub>2</sub> O-1                        | H-cell    | 80.0                         | 11.5                                     | 14        |
| Cu(B)-2                                       | H-cell    | 79.0                         | 70.0                                     | 15        |
| Cu/Cu <sub>2</sub> O@NG-2                     | H-cell    | 56.0                         | 19.0                                     | 16        |
| Cu HoMSs                                      | Flow-cell | 77.0                         | 667                                      | 17        |
| Cu-TABQ                                       | Flow-cell | 63.2                         | 423                                      | 18        |
| Cu <sub>2</sub> P <sub>2</sub> O <sub>7</sub> | Flow-cell | 73.6                         | 350                                      | 19        |
| h-Cu <sub>2</sub> O ONS                       | Flow-cell | 71.1                         | 200                                      | 20        |
| Pd <sup>δ</sup> -Cu <sub>3</sub> N            | Flow-cell | 78.2                         | 116                                      | 21        |
| Cu <sub>3</sub> N <sub>x</sub>                | Flow-cell | 81.7                         | 307                                      | 22        |
| Cu <sub>2</sub> O-Ag                          | Flow-cell | 72.8                         | 243                                      | 23        |
| Cu <sub>2</sub> O/ILGS-400                    | Flow-cell | 78.5                         | 123                                      | 24        |
| Nanoporous Cu                                 | Flow-cell | 62.0                         | 653                                      | 25        |

2

3

## 1 References

- 2 1. B. E. Perdew, *Phys. Rev. Lett.*, 1996, **77**, 3865-3868.
- 3 2. B. W. Perdew, *Phys. Rev., B Condens. Matter.*, 1996, **54**, 16533-16539.
- 4 3. Blochl, *Phys. Rev., B Condens. Matter.*, 1994, **50**, 17953-17979.
- 5 4. G. J. Kresse, D, *Phys. Rev., B Condens. Matter.*, 1999, **59**, 1758-1775.
- 6 5. Z. Chen, X. Liu, J. Zhao, Y. Jiao and L. Yin, *J. Mater. Chem. A*, 2020, **8**, 11986-11995.
- 7 6. C. Li, Y. Liu, X. Le, Y. Yu, Q. Gong, F. Yang and J. Xie, *J. Electrochem. Soc.*, 2020, **167**.
- 8 7. H. Sun, Z. Sun and Y. Wu, *Int. J. Hydrogen Energy*, 2012, **37**, 12821-12826.
- 9 8. M. Rahmati, H. Modarress and R. Gooya, *Polymer*, 2012, **53**, 1939-1950.
- 10 9. S. Pahari, C. K. Choudhury, P. R. Pandey, M. More, A. Venkatnathan and S. Roy, *J. Phys. Chem. B*, 2012, **116**, 7357-7366.
- 11
- 12 10. S. H, *J. Phys. Chem. B*, 1998, **102**, 7338-7364.
- 13 11. K. Golzar, S. Amjad-Iranagh, M. Amani and H. Modarress, *J. Membr. Sci.*, 2014, **451**, 117-134.
- 14
- 15 12. J. Yana, P. Nimmanpipug, S. Chirachanchai, R. Gosalarwit, S. Dokmaisrijan, S. Vannarat, T. Vilaitong and V. S. Lee, *Polymer*, 2010, **51**, 4632-4638.
- 16
- 17 13. T. Ohkubo, K. Kidena, N. Takimoto and A. Ohira, *J. Mol. Model*, 2011, **17**, 739-755.
- 18 14. Q. Zhu, X. Sun, D. Yang, J. Ma, X. Kang, L. Zheng, J. Zhang, Z. Wu and B. Han, *Nat. Commun.*, 2019, **10**, 3851.
- 19
- 20 15. Y. Zhou, F. Che, M. Liu, C. Zou, Z. Liang, P. De Luna, H. Yuan, J. Li, Z. Wang, H. Xie, H. Li, P. Chen, E. Bladt, R. Quintero-Bermudez, T. K. Sham, S. Bals, J. Hofkens, D. Sinton, G. Chen and E. H. Sargent, *Nat. Chem.*, 2018, **10**, 974-980.
- 21
- 22
- 23 16. W.-Y. Zhi, Y.-T. Liu, S.-L. Shan, C.-J. Jiang, H. Wang and J.-X. Lu, *J. CO2 Util.*, 2021, **50**.
- 24 17. C. Liu, M. Zhang, J. Li, W. Xue, T. Zheng, C. Xia and J. Zeng, *Angew. Chem. Int. Ed.*, 2022, **61**, e202113498.
- 25
- 26 18. F. Zhang, P. Wang, R. Zhao, Y. Wang, J. Wang, B. Han and Z. Liu, *ChemSusChem*, 2022, **15**, e202201267.
- 27
- 28 19. J. Sang, P. Wei, T. Liu, H. Lv, X. Ni, D. Gao, J. Zhang, H. Li, Y. Zang, F. Yang, Z. Liu, G. Wang and X. Bao, *Angew. Chem. Int. Ed.*, 2022, **61**, e202114238.
- 29
- 30 20. M. Jun, C. Kwak, S. Y. Lee, J. Joo, J. M. Kim, D. J. Im, M. K. Cho, H. Baik, Y. J. Hwang, H. Kim and K. Lee, *Small Methods*, 2022, **6**, e2200074.
- 31
- 32 21. Z. Zhang, S. Chen, J. Zhu, C. Ye, Y. Mao, B. Wang, G. Zhou, L. Mai, Z. Wang, X. Liu and D. Wang, *Nano Lett*, 2023, **23**, 2312-2320.
- 33
- 34 22. C. Peng, G. Luo, Z. Xu, S. Yan, J. Zhang, M. Chen, L. Qian, W. Wei, Q. Han and G. Zheng, *Adv Mater*, 2021, **33**, e2103150.
- 35
- 36 23. D. Niu, C. Wei, Z. Lu, Y. Fang, B. Liu, D. Sun, X. Hao, H. Pan and G. Wang, *Molecules*, 2021, **26**.
- 37
- 38 24. W. Wang, Z. Ma, X. Fei, X. Wang, Z. Yang, Y. Wang, J. Zhang, H. Ning, N. Tsubaki and M. Wu, *Chem. Eng. J.*, 2022, **436**.
- 39
- 40 25. J. J. Lv, M. Jouny, W. Luc, W. Zhu, J. J. Zhu and F. Jiao, *Adv. Mater.*, 2018, **30**, e1803111.
- 41
